# Supplementary material for: Fast, reversible optical sensing of NO2 using 5,10,15,20-tetrakis[3,4-bis(2-ethylhexyloxy)phenyl]-21H,23H-porphine assemblies
Source: Royal Society of Chemistry journal article supplement (doi:10.1039/b006342h), 2001-01-01
Supplement: b006342h.doc [file b006342h.doc]

# Electronic Supplementary Information

**Fast, reversible optical sensing of NO2 using**

**5,10,15,20-tetrakis(3,4-bis[2-ethylhexyloxy]phenyl)-**

### 21H,23H-porphine assemblies

# Colin M Dooling, Oliver Worsfold and Tim H Richardson*

# Applied Molecular Engineering Group, Department of Physics & Astronomy, University of Sheffield, Hounsfield Road, Sheffield S3 7RH (UK).

## Rose Tregonning, M.O. Vysotsky and Chris A Hunter

Department of Chemistry, University of Sheffield, Dainton Building, Brook Hill, Sheffield S3 7HF (UK).

## Keizo Kato, Kazunari Shinbo and Futao Kaneko

Graduate School of Science and Technology, Niigata University, Niigata, Japan.

*Corresponding Author: t.richardson@sheffield.ac.uk

# Notes on Ultra-fast LB Deposition

One of the disadvantages of the principal layer-by-layer deposition techniques, such as LB deposition and poly-ion adsorption of polyelectrolytes, is the slow rate of substrate coverage that can be achieved. Conventional LB deposition involves linear deposition rates of typically 0.1 – 10 mm per minute per monolayer, and poly-ion adsorption rates correspond to complete monolayer formation in around 10-20 minutes per layer. Very few attempts have ever been made to perform Langmuir film transfer at fast rates since this often leads to wetting of the substrate and imperfections in the built-up multilayer films.

However, for at least one application – toxic gas sensing - highly homogeneous, ordered and dense molecular films are often actually detrimental in achieving good performance. Researchers in the Applied Molecular Electronics Group at the University of Sheffield have recently achieved ultra-fast deposition of certain porphyrin monolayers to produce semi-ordered aggregated assemblies that act as highly sensitive toxic gas sensors. These coatings consist of isolated porphyrin “islands” distributed over the substrate in a fairly disordered manner. The multilayer structure of these islands is built up layer-by-layer and is not present before deposition within the Langmuir layer (Figure 1). It should be noted that deposition was not found possible for the title porphyrin at conventional transfer rates. Remarkably, these films are deposited at linear rates of 50 – 1500 mm minute-1. Multilayer deposition for many cycles is possible - for example, an assembly produced by cycling a 25 mm x 25 mm substrate through the floating Langmuir film 50 times takes less than two minutes to prepare. The deposition is achieved using a custom-built NIMA Fast Dipper deposition arm that can achieve translational linear deposition rates in the range 0.1 – 2000 mm minute-1.

Figure 1

For the application of gas-sensing, the most important design feature of a material is that the gas must have easy access into and out of the molecular assembly in order to achieve fast response and recovery rates. It is well-known that the surface adsorption and desorption from conventional LB films can often be quite fast; the

slow diffusive processes in relatively dense, close-packed LB films reduce their effectiveness as real sensors. Until now, researchers have focused their efforts in trying to identify materials which provide increased sensitivity whilst hardly bothering to change the way in which the films themselves are made. Assemblies prepared using the ultra-fast method have a large surface area to volume ratio – hence the surface adsorption process can become dominant and the disadvantage of the slow diffusion is reduced.

This work shows that LB film deposition rates can be dramatically increased for certain materials with a corresponding enhancement in materials performance for certain applications.
